# Supplementary material for: Translating a Thin-Film Rehydration Method to Microfluidics for the Preparation of a SARS-CoV-2 DNA Vaccine: When Manufacturing Method Matters
Source: MDPI journal article supplement (doi:10.3390/pharmaceutics14071427), 2022-07-07
Supplement: s1 [file s1]

**Supplementary figure S1:**

**WST-1 assays on RAW 264.7 cells after 24h incubation with lipoplexes manufactured by microfluidics**

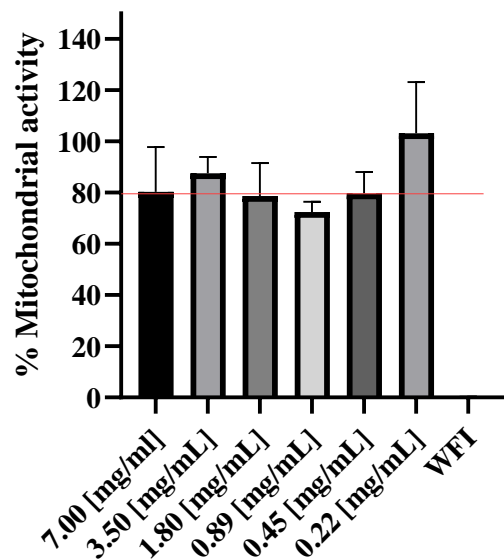

Fig S1. Toxicity of different concentrations of blank DOTAP 4 liposomes manufactured by microfluidics (MF) method liposomes on RAW 264.7 cells, incubated on cells for 24 h. Data were normalized to non-treated cell results.
